# Supplementary material
Source: Research Square preprint supplement (doi:10.21203/rs.3.rs-9691516/v1)
Supplement: Supplementary file 1 [file 0bebfa2fbacb546278cfef7f.docx]

**Clinical Vignettes**

This appendix contains 40 standardized clinical vignettes representing neuropathic and non-neuropathic pain conditions. All cases were constructed using a predefined structure including demographic characteristics, pain features, and associated symptoms, without providing diagnostic labels. The vignettes were independently developed and refined by two authors without the use of generative artificial intelligence tools.

**Section 1. Lumbar Radiculopathy (n=8)**

**Case 1 –** A 46-year-old man reports 3 months of pain starting in the lower back and radiating down the posterior aspect of the left leg to the calf. He describes the pain as sharp, burning, and electric shock–like. It worsens with prolonged sitting, coughing, and bending forward and improves somewhat with lying down. He also reports tingling and numbness in the same leg.

**Case 2 –** A 39-year-old woman presents with 6 weeks of pain in the right low back radiating to the lateral thigh and dorsum of the foot. She describes it as shooting and burning. The pain is aggravated by walking long distances and prolonged sitting and is partially relieved by changing position. She reports pins-and-needles sensation in the foot.

**Case 3 –** A 55-year-old man reports 4 months of pain localized to the low back and right buttock, radiating to the posterior thigh and heel. He describes the pain as electric shock–like and stabbing. It worsens with standing up from a chair, straining, and prolonged driving and improves with rest. He also notes numbness in the heel.

**Case 4 –** A 42-year-old woman presents with 2 months of pain in the left lumbar region radiating to the anterior thigh and medial leg. She describes it as burning and deep aching with intermittent sharp exacerbations. The pain worsens with walking downstairs and prolonged standing and improves with lying on her side. She reports tingling over the medial leg.

**Case 5 –** A 50-year-old man reports 5 months of pain beginning in the low back and spreading into the left buttock, lateral calf, and big toe. He describes the pain as burning, lancinating, and sometimes like an electric current. The pain is aggravated by bending, coughing, and prolonged sitting and improves slightly with short walks and rest. He also reports numbness and tingling in the big toe. He takes multiple medications for neuropathic pain, but the symptoms persist.

**Case 6 –** A 44-year-old woman presents with 8 weeks of pain in the right lower back radiating to the posterior thigh. She describes it as sharp and burning, with occasional electric jolts. It worsens when lifting objects and after long car rides and improves with lying flat. She reports a crawling sensation in the posterior thigh.

**Case 7 –** A 61-year-old man reports 6 months of pain in the lumbar region radiating to the left leg below the knee. He describes the pain as burning and stabbing. It worsens with standing and walking and improves with sitting and resting. He also reports numbness and tingling in the lower leg. Over the past two weeks, he has noticed increasing difficulty lifting his left foot while walking and has begun to trip occasionally.

**Case 8 –** A 48-year-old woman presents with 10 weeks of pain starting in the low back and radiating into the right buttock and lateral leg. She describes it as shooting, burning, and sometimes throbbing. The pain is aggravated by twisting, coughing, and prolonged sitting and is partially relieved by rest and posture changes. She reports intermittent numbness in the lateral leg. Over the past week, she has noticed difficulty initiating urination and a sensation of incomplete bladder emptying.

**Section 2. Diabetic Neuropathy (n=6)**

**Case 9 –** A 62-year-old man with a history of diabetes reports 1 year of pain in both feet, predominantly involving the soles and toes. He describes the pain as burning, tingling, and pins-and-needles–like. It is worse at night and during rest and is slightly relieved by walking or rubbing the feet. He also reports numbness in both feet.

**Case 10 –** A 57-year-old woman presents with 8 months of pain in the feet and lower legs bilaterally. She describes the pain as burning and electric shock–like, with occasional stabbing sensations. The discomfort is worse at night and when lying in bed and improves somewhat with movement. She reports tingling and reduced sensation in the toes.

**Case 11 –** A 65-year-old man reports 2 years of gradually worsening pain in the toes, soles, and ankles bilaterally. He describes it as burning, prickling, and numbness occurring simultaneously. The pain worsens in the evening and is slightly relieved by brief walking. He also reports a sensation of wearing tight socks.

**Case 12 –** A 54-year-old woman with diabetes presents with 10 months of pain affecting both feet, extending to the mid-calves. She describes the pain as burning and tingling, sometimes knife-like. It is aggravated at night and during rest and is partially relieved by dangling her legs off the bed. She also reports numbness and hypersensitivity to light touch, including bedsheets.

**Case 13 –** A 60-year-old man reports 14 months of pain in a stocking-like distribution over both feet. He describes the pain as burning, stinging, and electric shock–like. It is worse at night and after prolonged inactivity and is mildly relieved by walking. He also reports tingling and reduced proprioceptive awareness in the toes.

**Case 14 –** A 58-year-old woman presents with 9 months of pain in both feet, more pronounced in the toes and forefeet. She describes it as hot, burning, and prickling. The discomfort worsens in the late evening and during rest in bed and improves somewhat with cooling the feet. She also reports numbness and tingling in the same areas.

**Section 3. Postherpetic Neuralgia (n=4)**

**Case 15 –** A 68-year-old woman reports 5 months of pain over the left chest wall following a shingles episode in the same area. The pain is described as burning, stabbing, and highly sensitive. It worsens with light touch, clothing contact, and exposure to cold air and improves slightly when she avoids touching the area. She also reports itching and tingling.

**Case 16 –** A 72-year-old man presents with 4 months of pain over the right upper back and lateral chest wall following a healed rash several months earlier. He describes the pain as burning, electric shock–like, and intermittently sharp. It is aggravated by shirt contact and exposure to shower water and is partially relieved by keeping the area uncovered. He reports increased skin sensitivity.

**Case 17 –** A 64-year-old woman reports 6 months of persistent pain over the left forehead and scalp following a previous episode of shingles. She describes the pain as burning and stabbing, with occasional electric shock–like flares. Despite treatment with gabapentin (2400 mg/day), her symptoms have persisted. The pain worsens with wind exposure, combing her hair, and light touch to the skin and improves somewhat with rest. She also reports itching and marked hypersensitivity in the same area.

**Case 18 –** A 70-year-old man presents with 7 months of pain in the right abdominal wall following a prior episode of shingles. He describes the pain as burning, raw, and sharp. It is aggravated by light touch and clothing friction and improves slightly when he lies still without clothing contacting the skin. He also reports tingling in the affected area. He discontinued pain medications due to significant side effects.

**Section 4. Trigeminal Neuralgia (n=4)**

**Case 19 –** A 59-year-old woman reports 3 months of severe pain on the right side of the face, mainly involving the cheek and jaw. She describes the pain as electric shock–like and stabbing, lasting only a few seconds at a time. The attacks are triggered by chewing, brushing her teeth, talking, and light touch to the face, and the pain resolves completely between episodes. She reports avoiding washing her face due to fear of triggering an attack. During particularly intense episodes, she states that the pain is so severe that she cries out.

**Case 20 –** A 66-year-old man presents with 5 months of recurrent pain in the left upper jaw and cheek. He describes it as sudden, sharp, electric shock–like, and severe, occurring in brief bursts. The pain is triggered by cold wind, shaving, and speaking and improves when he remains still and avoids touching the area. He reports no symptoms between attacks.

**Case 21 –** A 54-year-old woman reports 4 months of brief but intense pain involving the right lower face and chin. She describes the pain as electric shock–like or stabbing. The attacks are provoked by eating, brushing her teeth, and light touch near the mouth and resolve spontaneously within seconds. She also reports anticipatory anxiety before meals. She states that she was prescribed carbamazepine for the pain, but the attacks have persisted despite treatment. She reports an unintended weight loss of approximately 5 kg over the past two weeks.

**Case 22 –** A 63-year-old woman presents with 6 months of paroxysmal pain on the left side of the face, centered around the upper lip and cheek. She describes it as shooting and electric shock–like. The pain is triggered by talking, smiling, and washing her face and is relieved by avoiding facial movement. She has symptom-free intervals between attacks.

**Section 5. Complex Regional Pain Syndrome (n=4)**

**Case 23 –** A 41-year-old woman reports 4 months of pain in the right hand and wrist beginning after a minor fracture. She describes the pain as burning and deep, and disproportionate to the initial injury. It worsens with movement, light touch, and exposure to cold and improves slightly with rest. She also reports swelling, temperature sensitivity, and a sensation of stiffness in the hand.

**Case 24 –** A 36-year-old man presents with 3 months of pain in the left foot and ankle following an ankle sprain. He describes the pain as burning, throbbing, and highly sensitive. It is aggravated by walking, wearing socks, and light contact and improves somewhat with elevation and rest. He also reports swelling and marked sensitivity to touch.

**Case 25 –** A 49-year-old woman reports 5 months of persistent pain in the right forearm and hand following surgery. She describes the pain as burning, tearing, and markedly hypersensitive. The pain worsens with light touch, hand use, and emotional stress and is partially relieved by resting the arm. She also reports swelling, sweating changes, and pronounced intolerance to contact in the affected limb. She states that she has undergone physical therapy and has used prescribed pain medications; however, her symptoms have not improved.

**Case 26 –** A 45-year-old man presents with 6 months of pain in the left lower leg and foot following a minor injury. He describes the pain as burning and searing, with intermittent sharp exacerbations. It is aggravated by standing, movement, and touch and improves slightly when he keeps the leg still. He also reports swelling and abnormal sensitivity to temperature.

**Section 6. Myofascial Pain (n=5)**

**Case 27 –** A 38-year-old woman reports 7 months of pain on the right side of the neck and shoulder. The pain occasionally radiates to the occipital region and upper arm. She describes it as aching, tight, and pressure-like. It worsens with stress, prolonged desk work, and poor posture and improves with massage, stretching, and heat. She also reports muscle tightness.

**Case 28 –** A 44-year-old man presents with 5 months of pain in the upper back between the shoulder blades. The pain occasionally radiates toward the shoulders. He describes it as dull, tight, and cramping. It is aggravated by prolonged computer use and physical tension and is relieved by rest, heat, and posture correction. He reports a sensation of muscle stiffness.

**Case 29 –** A 35-year-old woman reports 4 months of pain in the left shoulder and upper arm. She describes it as aching and tight, sometimes with a pulling sensation. The pain worsens with repetitive arm activity and stress and improves with massage and rest. She reports localized tightness without associated numbness or tingling.

**Case 30 –** A 52-year-old man presents with 8 months of pain in the low back and buttock region. The pain occasionally radiates to the posterior thigh but does not extend below the knee. He describes it as deep aching and tight. It worsens with prolonged standing and overuse and improves with rest, stretching, and heat. He reports muscle tightness without burning or electric shock–like sensations.

**Case 31 –** A 40-year-old woman reports 6 months of pain involving the jaw, temple, and lateral aspect of the face. She describes it as aching, pressure-like, and tight. It worsens with stress, chewing, and jaw clenching and improves with rest and heat. She also reports a sensation of tightness in the jaw muscles.

**Section 7. Osteoarthritis Pain (n=5)**

Case 32 – A 67-year-old woman reports 2 years of pain in both knees, more pronounced on the right. She describes the pain as deep, aching, and occasionally sharp with movement. It worsens with walking, climbing stairs, and prolonged standing and improves with rest. She also reports brief morning stiffness.

**Case 33 –** A 71-year-old man presents with 3 years of pain in the right hip, occasionally radiating to the groin and anterior thigh. He describes it as aching and mechanical. The pain is aggravated by walking and weight-bearing activities and is relieved by sitting and rest. He reports stiffness following periods of inactivity.

**Case 34 –** A 63-year-old woman reports 18 months of pain in the hands, predominantly involving the finger joints. She describes it as aching and sore. The pain worsens with gripping, cooking, and repetitive hand activity and improves with rest and warmth. She reports brief morning stiffness.

**Case 35 –** A 69-year-old man presents with 4 years of pain in the lower back. He describes it as deep aching and mechanical. The pain worsens with standing, walking, and physical activity and improves with sitting and rest. He reports stiffness upon waking that resolves quickly.

**Case 36 –** A 65-year-old woman reports 2 years of pain in the left knee, occasionally extending slightly above and below the joint. She describes it as aching and heavy, and worse with use. The pain is aggravated by climbing stairs, prolonged walking, and rising from a seated position and is relieved by rest. She also reports brief morning stiffness.

**Section 8. Fibromyalgia (n=4)**

**Case 37 –** A 43-year-old woman reports 2 years of widespread pain involving the neck, shoulders, back, hips, and legs. She describes the pain as aching, burning, and exhausting. It worsens with poor sleep, stress, and physical overexertion and improves somewhat with rest and warmth. She also reports fatigue, unrefreshing sleep, and difficulty concentrating.

**Case 38 –** A 48-year-old woman presents with 18 months of diffuse body pain affecting the upper and lower limbs as well as the trunk. She describes it as aching, sore, and occasionally burning. The pain is aggravated by stress, cold weather, and sleep deprivation and improves slightly with gentle movement and rest. She also reports fatigue and poor sleep quality.

**Case 39 –** A 39-year-old man reports 1 year of pain in multiple body regions, particularly involving the shoulders, back, hips, and thighs. He describes it as deep, persistent aching, sometimes accompanied by a burning sensation. The pain worsens with stress and inadequate sleep and improves somewhat with light physical activity. He also reports daytime fatigue and difficulty concentrating.

**Case 40 –** A 51-year-old woman presents with 3 years of generalized pain involving the neck, upper back, lower back, arms, and legs. She describes the pain as aching, tender, and occasionally burning. It worsens following poor sleep, emotional stress, and physical exertion and improves partially with warm showers and rest. She also reports fatigue, nonrestorative sleep, and cognitive difficulties.
